# Supplementary material for: Mechanism of Action of the Sesquiterpene Compound Helenalin in Rhabdomyosarcoma Cells
Source: Pharmaceuticals (Basel). 2021 Dec 2;14(12):1258. doi: 10.3390/ph14121258 (PMC8703838; doi:10.3390/ph14121258)
Supplement: Supplementary file 1 [file pharmaceuticals-14-01258-s001.zip › pharmaceuticals-1404326-supplementary.pdf]

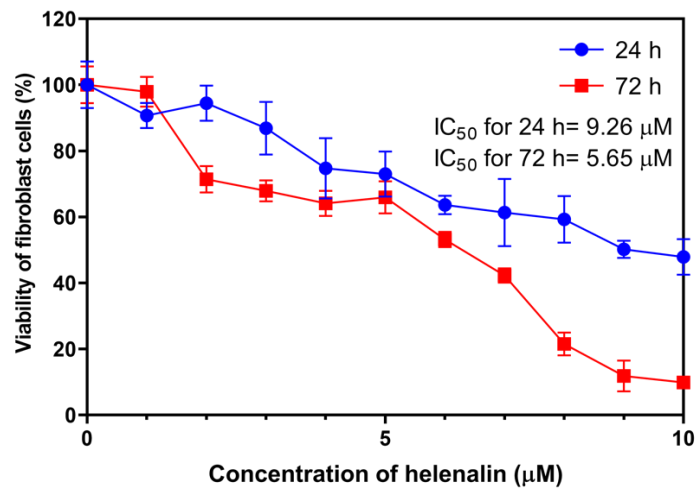

**Figure S1.** Viable cell number assessed using an MTT assay after fibroblast cells were treated with various concentrations (0 - 10  $\mu\text{M}$ ) of helenalin for 24 h and 72 h.

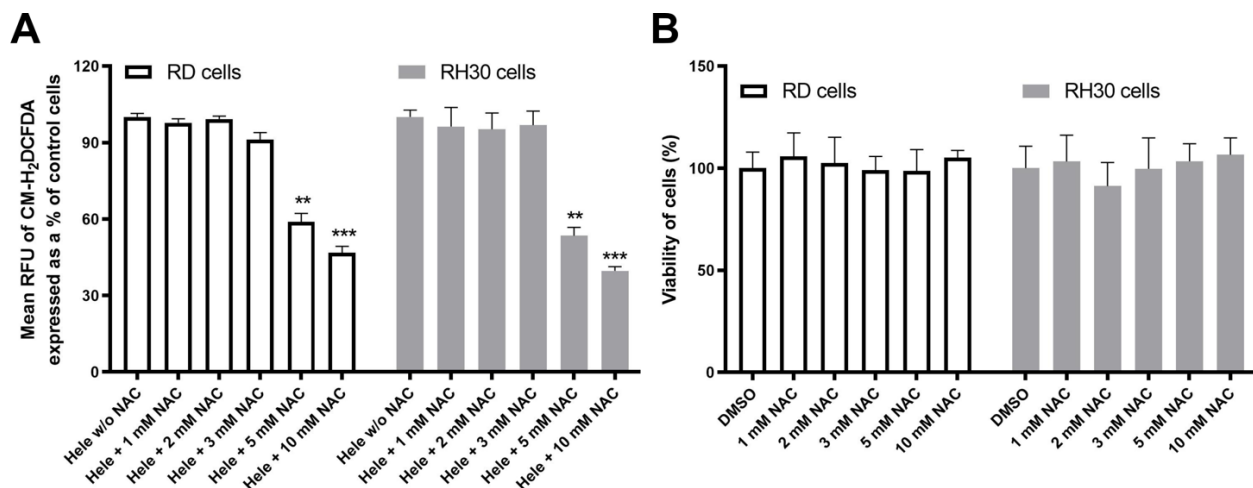

**Figure S2.** Concentration optimisation of NAC for the pre-treatment in RD and RH30 cells. (A) The comparative analysis of ROS levels indicated by RFU of CM-H<sub>2</sub>DCFDA of RMS cells from the measurement using a plate reader. Here, the cells were treated with helenalin for 24 h after treated with DMSO (Hele w/o NAC), 1 mM NAC (Hele + 1 mM NAC), 2 mM NAC (Hele + 2 mM NAC), 3 mM NAC (Hele + 3 mM NAC), 5 mM NAC (Hele + 5 mM NAC) and 10 mM NAC (Hele + 10 mM NAC) for 2 h. (B) The comparative analysis of viabilities of RMS cells from the crystal violet staining assay. Here, the cells were treated with DMSO, 1 mM NAC, 2 mM NAC, 3 mM NAC, 5 mM NAC and 10 mM NAC for 2 h. Significances were tested using a two-tailed t-test (\*\*  $P \leq 0.01$ , \*\*\*  $P \leq 0.001$ ).

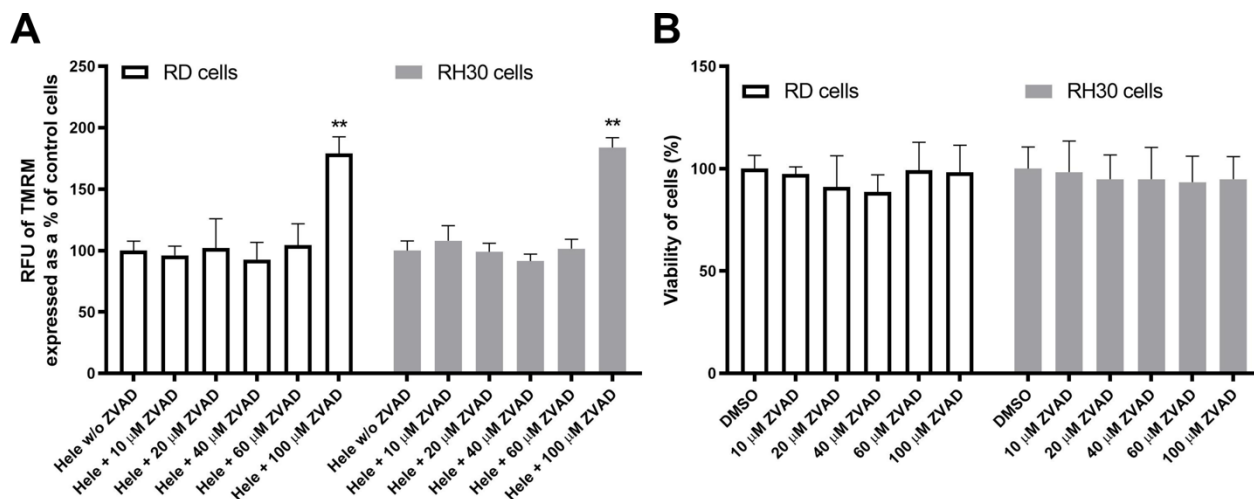

**Figure S3.** Concentration optimisation of ZVAD for the pre-treatment in RD and RH30 cells. (A) The comparative analysis of MMP levels indicated by RFU of TMRM of RMS cells from the measurement using a plate reader. Here, the cells were treated with helenalin for 24 h after treated with DMSO (Hele w/o ZVAD), 10  $\mu$ M ZVAD (Hele + 10  $\mu$ M ZVAD), 20  $\mu$ M ZVAD (Hele + 20  $\mu$ M ZVAD), 40  $\mu$ M ZVAD (Hele + 40  $\mu$ M ZVAD), 60  $\mu$ M ZVAD (Hele + 60  $\mu$ M ZVAD) and 100  $\mu$ M ZVAD (Hele + 100  $\mu$ M ZVAD) for 24 h. (B) The comparative analysis of viabilities of RMS cells from the crystal violet staining assay. Here, the cells were treated with DMSO, 10  $\mu$ M ZVAD, 20  $\mu$ M ZVAD, 40  $\mu$ M ZVAD, 60  $\mu$ M ZVAD and 100  $\mu$ M ZVAD for 24 h. Significances were tested using a two-tailed t-test (\*\*  $P \leq 0.01$ ).

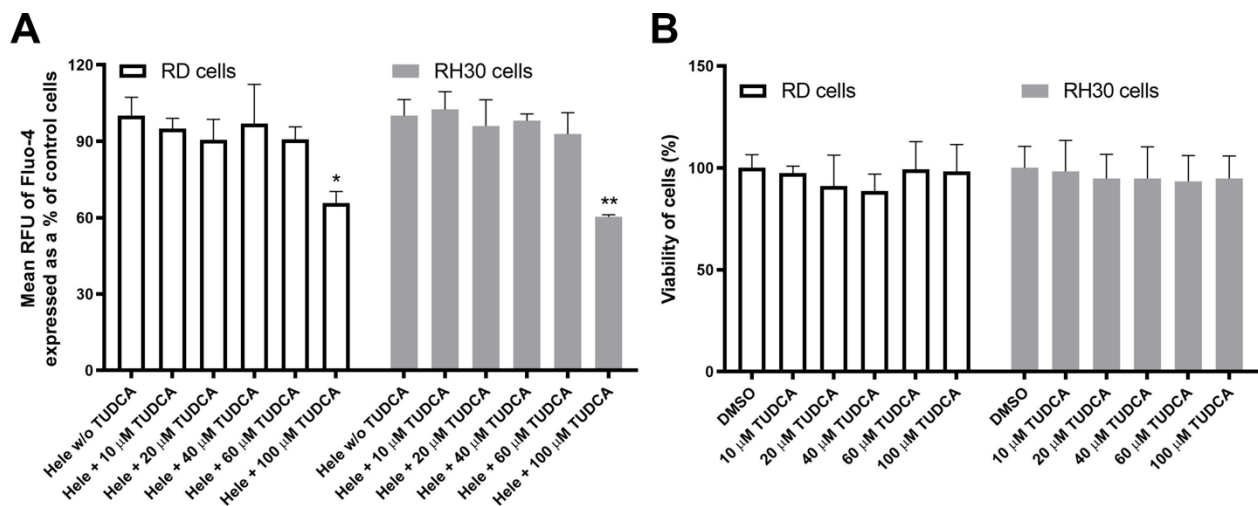

**Figure S4.** Concentration optimisation of TUDCA for the pre-treatment in RD and RH30 cells. (A) The comparative analysis of  $\text{Ca}^{2+}$  levels indicated by RFU of Fluo-4 of RMS cells from the measurement using a plate reader. Here, the cells were treated with helenalin for 24 h after treated with DMSO (Hele w/o TUDCA), 10  $\mu$ M TUDCA (Hele + 10  $\mu$ M TUDCA), 20  $\mu$ M TUDCA (Hele + 20  $\mu$ M TUDCA), 40  $\mu$ M TUDCA (Hele + 40  $\mu$ M TUDCA), 60  $\mu$ M TUDCA (Hele + 60  $\mu$ M TUDCA) and 100  $\mu$ M TUDCA (Hele + 100  $\mu$ M TUDCA) for 30 min. (B) The comparative analysis of viabilities of RMS cells from the crystal violet staining assay. Here, the cells were treated with DMSO, 10  $\mu$ M TUDCA, 20  $\mu$ M TUDCA, 40  $\mu$ M TUDCA, 60  $\mu$ M TUDCA and 100  $\mu$ M TUDCA for 30 min. Significances were tested using a two-tailed t-test (\*  $P \leq 0.05$ , \*\*  $P \leq 0.01$ ).

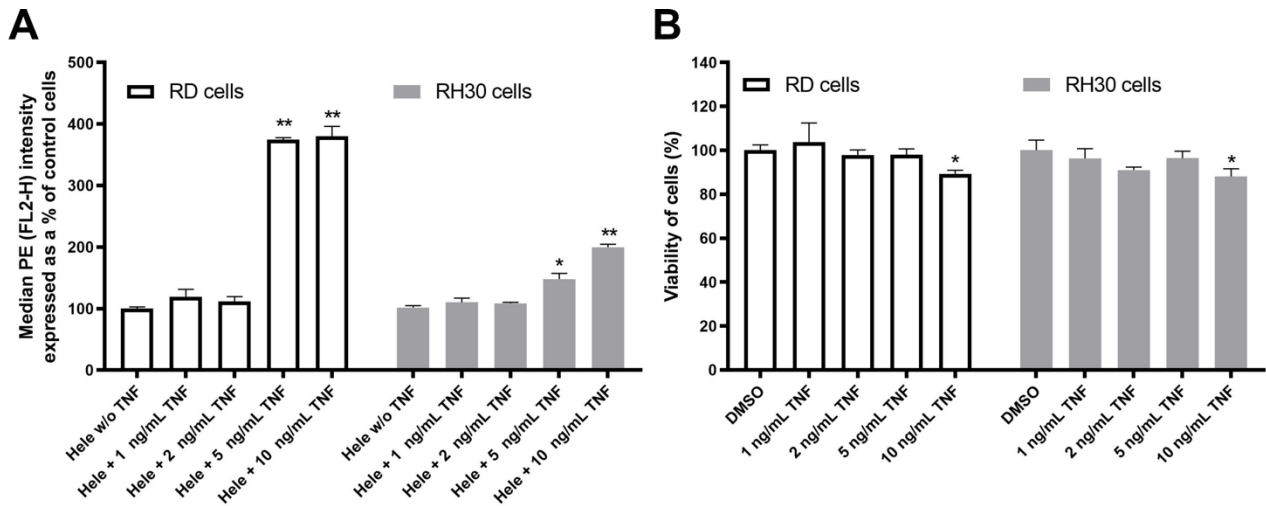

**Figure S5.** Concentration optimisation of TNF- $\alpha$  for the pre-treatment in RD and RH30 cells. (A) The comparative analysis of phosphorylated levels of NF- $\kappa$ B p65 at Serine 529 indicated by median fluorescence of PE of RMS cells from the flow cytometry measurement. Here, the cells were treated with helenalin for 24 h after treated with DMSO (Hele w/o TNF), 1 ng/mL TNF- $\alpha$  (Hele + 1 ng/mL TNF), 2 ng/mL TNF- $\alpha$  (Hele + 2 ng/mL TNF), 5 ng/mL TNF- $\alpha$  (Hele + 5 ng/mL TNF) and 10 ng/mL TNF- $\alpha$  (Hele + 10 ng/mL TNF) for 1 h. (B) The comparative analysis of viabilities of RMS cells from the crystal violet staining assay. Here, the cells were treated with DMSO, 1 ng/mL TNF- $\alpha$  (1 ng/mL TNF), 2 ng/mL TNF- $\alpha$  (2 ng/mL TNF), 5 ng/mL TNF- $\alpha$  (5 ng/mL TNF) and 10 ng/mL TNF- $\alpha$  (10 ng/mL TNF) for 1 h. Significances were tested using a two-tailed t-test (\*  $P \leq 0.05$ , \*\*  $P \leq 0.01$ ).

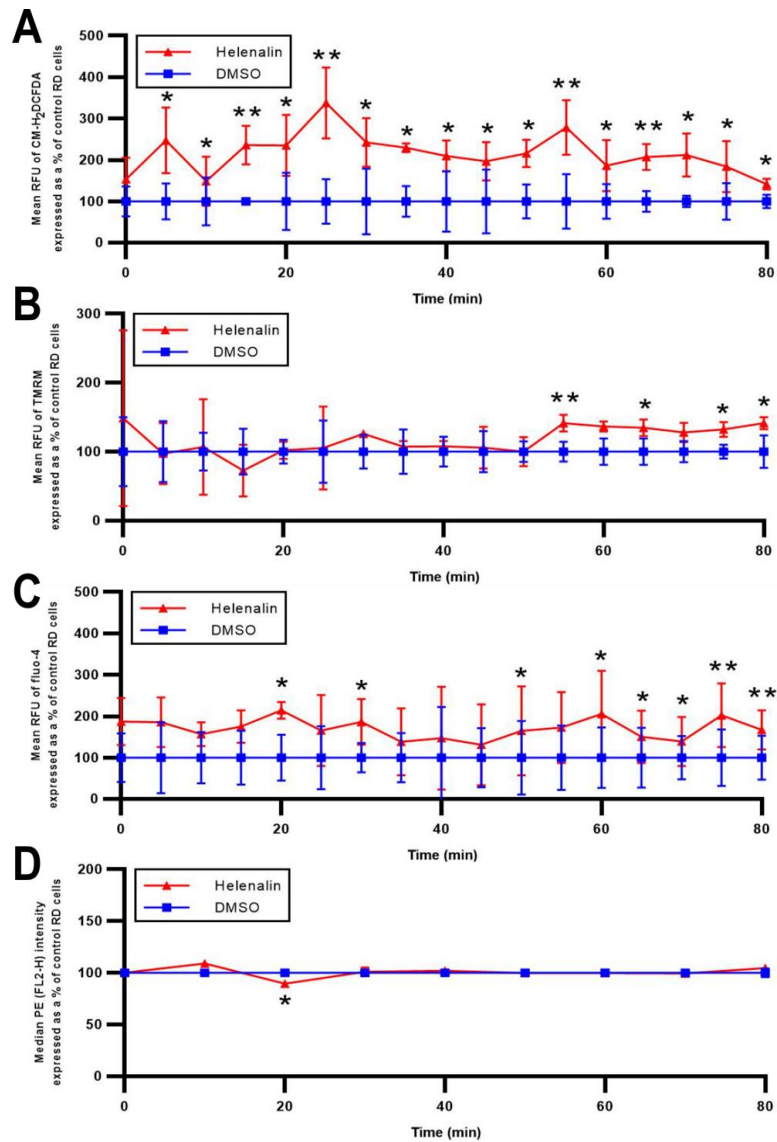

**Figure S6.** Signal changes from several pathways by helenalin treatment in RD cells. (A) ROS levels (mean RFU of CM-H<sub>2</sub>DCFDA) of cells treated with DMSO and 5  $\mu$ M helenalin over 80 min, (B) MMP levels (mean RFU of TMRM) of cells treated with DMSO and 5  $\mu$ M helenalin over 80 min, (C) Ca<sup>2+</sup> levels (mean RFU of Fluo-4) of cells treated with DMSO and 5  $\mu$ M helenalin over 80 min and (D) NF- $\kappa$ B p65 phosphorylation levels (mean RFU of PE) of cells treated with DMSO and 5  $\mu$ M helenalin over 80 min. Significances were tested using a two-tailed t-test (\*  $P \leq 0.05$ , \*\*  $P \leq 0.01$ ).

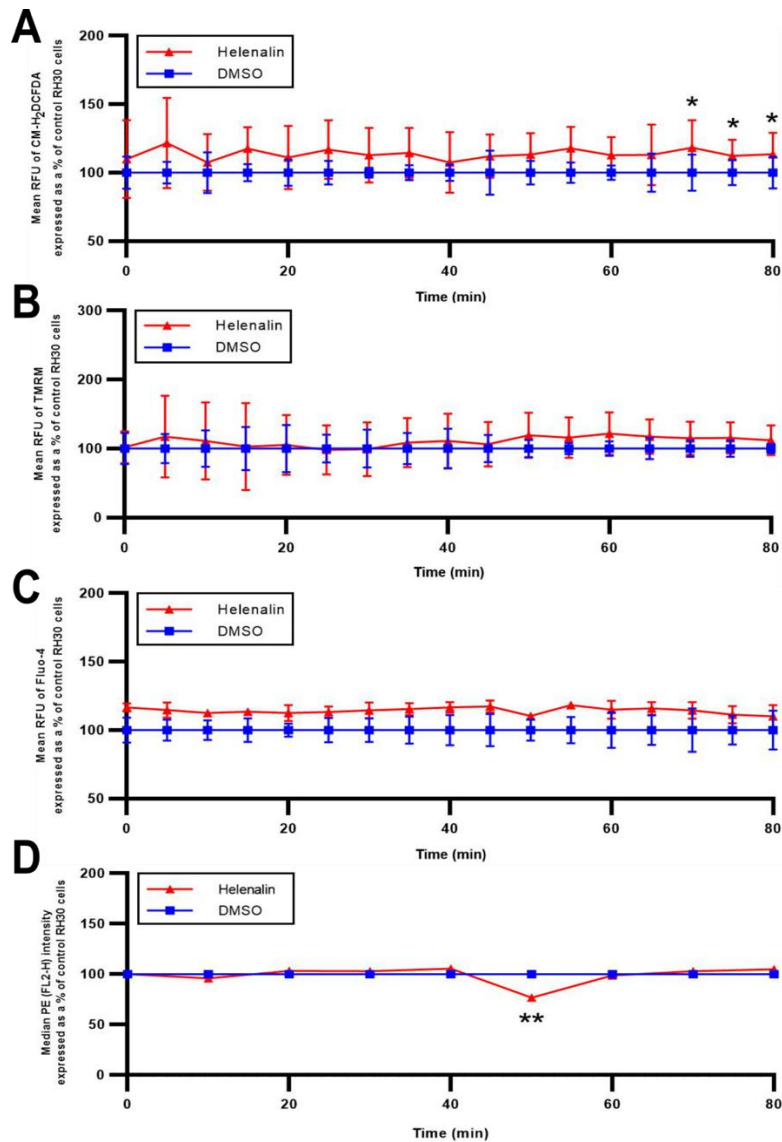

**Figure S7.** Signal changes from several pathways by helenalin treatment in RH30 cells. (A) ROS levels (mean RFU of CM-H<sub>2</sub>DCFDA) of cells treated with DMSO and 5  $\mu$ M helenalin over 80 min, (B) MMP levels (mean RFU of TMRM) of cells treated with DMSO and 5  $\mu$ M helenalin over 80 min, (C) Ca<sup>2+</sup> levels (mean RFU of Fluo-4) of cells treated with DMSO and 5  $\mu$ M helenalin over 80 min and (D) NF- $\kappa$ B p65 phosphorylation levels (mean RFU of PE) of cells treated with DMSO and 5  $\mu$ M helenalin over 80 min. Significances were tested using a two-tailed t-test (\*  $P \leq 0.05$ , \*\*  $P \leq 0.01$ ).
